# Supplementary material for: PdCl2(py)2 encaged in monodispersed zeolitic hollow spheres: a highly efficient and reusable catalyst for Suzuki–Miyaura cross-coupling reaction in aqueous media
Source: Royal Society of Chemistry journal article supplement (doi:10.1039/c2gc35302d), 2012-01-01
Supplement: c2gc35302d.pdf [file c2gc35302d.pdf]

# **PdCl<sub>2</sub>(py)<sub>2</sub> encaged in monodispersed zeolitic hollow spheres: a highly efficient and reusable catalyst for Suzuki–Miyaura cross-coupling reaction in aqueous media**

Zhenhong Guan, Jianglin Hu, Yanlong Gu, Haojun Zhang, Guangxing Li and Tao Li\*

*Key Laboratory for Large-Format Battery Materials and System, Ministry of Education, Huazhong University of Science and Technology, Wuhan 430074, PR China*

*Fax: +86 27 87543632;*

*Tel: +86 27 87557048;*

*E-mail: taoli@mail.hust.edu.cn*

## **1. Experimental details**

### **1.1 Synthesis of mesoporous silica spheres (MSS)**

*n*-Hexadecylamine 1 g was dissolved in a mixture of 90 ml isopropanol and 100 ml water at room temperature. Afterwards 1.4 ml ammonia (25%-28%) and 5.8 ml TEOS were added stepwise under stirring, the white mixture was left for 24 h at room temperature. Then the solid was isolated by centrifugation and washed with ethanol and distilled water three times respectively. After drying at 80 °C for 4 h, the product was submitted to calcination in air at 600 °C for 4 h (heating rate: 2 °C/min)

### **1.2 Synthesis of silicalite-1 seeds**

7 g TPAOH, 3 g H<sub>2</sub>O and 5 g TEOS were mixed together and stirred at ambient temperature to form a clear solution, then the liquor was transferred into a flask to crystallize at 80 °C. After refluxing for 3 days, the milk was enclosed in a semipermeable membrane bag to low down pH.

### **1.3 Synthesis of SHS**

The as-synthesised MSS were seeded with the silicalite-1 seeds through a layer-by-layer procedure to get silicalite-1 coated MSSs. Then the sample was treated through a two-step hydrothermal approach: 0.1 g of silicalite-1 coated MSSs were hydrothermally treated in 15 ml of 1.5 wt% TPAOH aqueous solution at 100 °C for 1 h, and then continuously treated in 15 ml aqueous solution with a molar composition of TPAOH:TEOS:H<sub>2</sub>O = 3:10:2000 at 100 °C for 8 h. The solid product was separated by centrifugation and washed with distilled water three times. After drying at 60 °C for 2 h, templates in the samples were removed by calcination in air at 550 °C for 4 h (heating rate: 2 °C/min).

## 2. Supplemental figures

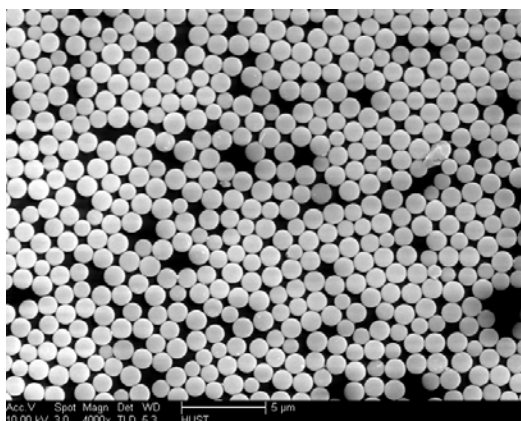

**Fig. S1** SEM image of MSS.

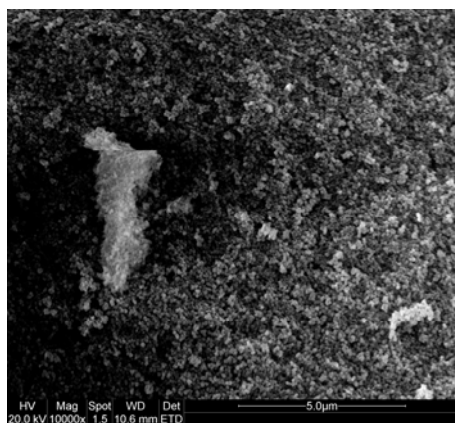

**Fig. S2** SEM image of silicalite-1 seeds.

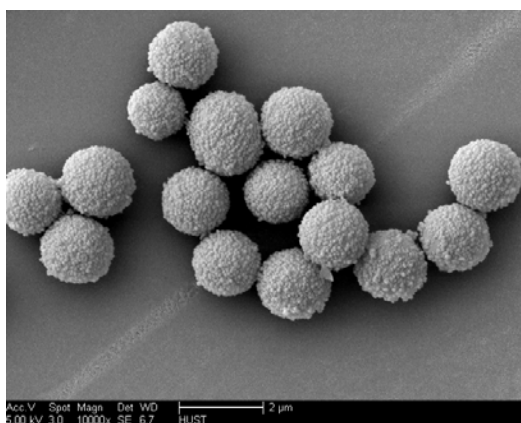

**Fig. S3** SEM image of silicalite-1 coated MSS.

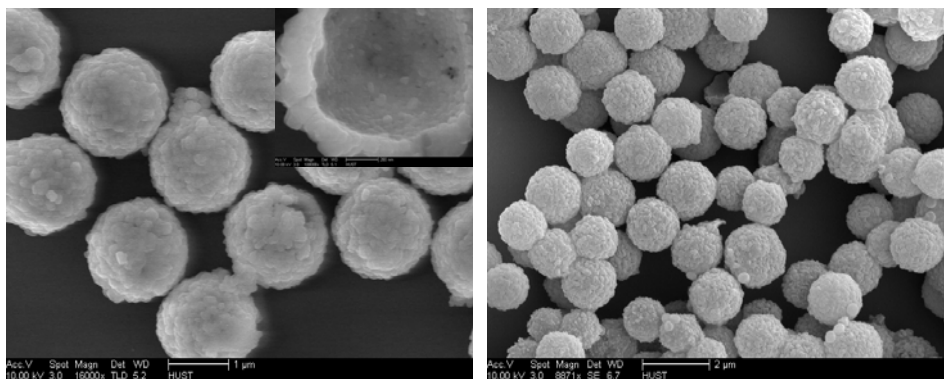

**Fig. S4** SEM image of SHS. The inset represents a broken sphere.

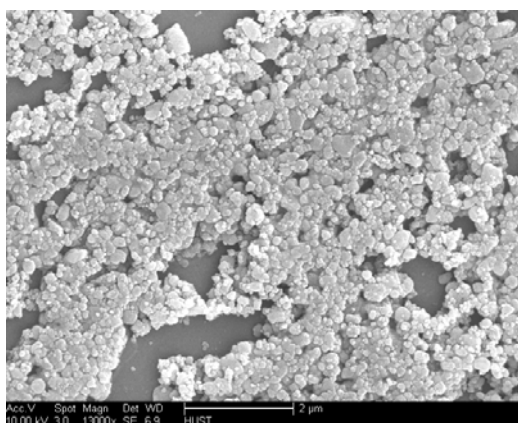

**Fig. S5** SEM image of shell-crushed  $\text{PdCl}_2(\text{py})_2@$ SHS by heavily grinding.

### 3. $^1\text{H}$ NMR data for the coupling products

#### **Biphenyl.**

White solid, mp 69–70 °C;

$^1\text{H}$  NMR (400 MHz,  $\text{CDCl}_3$ ):  $\delta$  7.59 (d, 4 H,  $J = 7.2$  Hz), 7.44 (t, 4 H,  $J = 8.0$  Hz), 7.34 (tt, 2 H,  $J_a = 1.2$  Hz,  $J_b = 7.6$  Hz).

#### **4-*tert*-Butylbiphenyl.**

White solid, mp 49–50 °C;

$^1\text{H}$  NMR (400 MHz,  $\text{CDCl}_3$ ):  $\delta$  7.55–7.62 (m, 4 H), 7.42–7.50 (m, 4 H), 7.34 (m, 1 H), 1.39 (s, 9 H).

#### **4-Methoxybiphenyl.**

White solid, mp 89–90 °C;

$^1\text{H}$  NMR (400 MHz,  $\text{CDCl}_3$ ):  $\delta$  7.51–7.56 (m, 4 H), 7.39–7.43 (m, 2 H), 7.30 (t, 1 H,  $J = 7.6$  Hz), 6.98 (d, 2 H,  $J = 8.8$  Hz), 3.85 (s, 3 H).

#### **4-Cynaobiphenyl.**

White solid, mp 85–86 °C;

$^1\text{H}$  NMR (400 MHz,  $\text{CDCl}_3$ ):  $\delta$  7.35–7.42 (m, 3 H), 7.50 (d, 2 H,  $J = 7.8$  Hz), 7.53–7.64 (m, 4 H).

#### **4-Biphenylcarboxaldehyde.**

White solid, mp 57–58 °C;

$^1\text{H}$  NMR (400 MHz,  $\text{CDCl}_3$ ):  $\delta$  10.07 (s, 1 H), 7.95 (d, 2 H,  $J = 7.8$  Hz), 7.75 (d, 2 H,  $J$

= 7.8 Hz), 7.43–7.66 (m, 5 H).

**4-Methylbiphenyl.**

White solid, mp 46–48 °C;

<sup>1</sup>H NMR (400 MHz, CDCl<sub>3</sub>): δ 7.57 (d, 2 H, *J* = 6.8 Hz), 7.49 (d, 2 H, *J* = 8.0 Hz), 7.42 (t, 2 H, *J* = 7.2 Hz), 7.31 (tt, 1 H, *J<sub>a</sub>* = 2.0 Hz, *J<sub>b</sub>* = 7.2 Hz), 7.24 (d, 2 H, *J* = 8.4 Hz), 2.39 (s, 3 H).

**4,4'-Dimethylbiphenyl.**

White solid, mp 122–124 °C;

<sup>1</sup>H NMR (400 MHz, CDCl<sub>3</sub>): δ 7.47 (d, 4 H, *J* = 8.0 Hz); 7.23 (d, 4 H, *J* = 8.8 Hz); 2.39 (s, 6 H).

**4-Methoxy-4'-Methylbiphenyl.**

White solid, mp 109–110 °C;

<sup>1</sup>H NMR (400 MHz, CDCl<sub>3</sub>): δ 7.50 (d, 2 H, *J* = 8.8 Hz), 7.44 (d, 2 H, *J* = 8.0 Hz), 7.21 (d, 2 H, *J* = 8.0 Hz), 6.96 (d, 2 H, *J* = 8.8 Hz), 3.84 (s, 3 H), 2.38 (s, 3 H).

**4-tert-Butyl-4'-Methylbiphenyl.**

White solid, mp 75–76 °C;

<sup>1</sup>H NMR (400 MHz, CDCl<sub>3</sub>): δ 7.43–7.53 (m, 6 H), 7.23 (d, 2 H, *J* = 8.2 Hz), 2.38 (s, 3 H), 1.35 (s, 9 H).

**4-Cyano-4'-methylbiphenyl.**

White solid, mp 110–111 °C;

<sup>1</sup>H NMR (400 MHz, CDCl<sub>3</sub>): δ 7.64–7.72 (m, 4 H), 7.49 (d, 2 H, *J* = 8.4 Hz), 7.29 (d, 2 H, *J* = 8.8 Hz), 2.40 (s, 3 H).

**4'-Methyl-4-biphenylcarboxaldehyde.**

White solid, mp 105–107 °C;

<sup>1</sup>H NMR (400 MHz, CDCl<sub>3</sub>): 10.03 (s, 1 H), 7.91 (d, *J* = 8.4, 2 H), 7.2 (d, *J* = 8.4, 2 H), 7.53 (d, *J* = 8.0, 2 H), 7.28 (d, *J* = 8.4, 2 H), 2.42 (s, 3 H).

**4-Trifluoromethylbiphenyl.**

White solid, mp 69–70 °C;

<sup>1</sup>H NMR (400 MHz, CDCl<sub>3</sub>): δ 7.67 (s, 4 H); 7.57 (d, 2 H, *J* = 8.0 Hz); 7.37–7.47 (m, 3 H).

**4-Chlorobiphenyl.**

White solid, mp 75–76 °C;

<sup>1</sup>H NMR (400 MHz, CDCl<sub>3</sub>): δ 7.47–7.54 (m, 4 H), 7.31–7.43 (m, 5 H).

**3,5-Dimethylbiphenyl.**

Colorless oil;

<sup>1</sup>H NMR (400 MHz, CDCl<sub>3</sub>): δ 7.55–7.57 (m, 2 H), 7.37–7.42 (m, 2 H), 7.30–7.33 (m, 1 H), 7.20 (s, 2 H), 6.98 (s, 1 H), 2.36 (s, 6 H).

**4-Methoxycarbonylbiphenyl.**

White solid, mp 116–117 °C;

<sup>1</sup>H NMR (400 MHz, CDCl<sub>3</sub>): δ 8.07 (d, 2 H, *J* = 8.4 Hz), 7.63–7.69 (m, 4 H), 7.38–7.50 (m, 3 H), 3.95 (s, 3 H).

**2-Methoxycarbonylbiphenyl.**

White solid, mp 110–111 °C;

<sup>1</sup>H NMR (400 MHz, CDCl<sub>3</sub>): δ 7.35–7.65 (m, 8 H), 3.67 (s, 3 H).
